# Supplementary material for: A catalytic assembly triggered DNAzyme motor on spherical nucleic acids for sensitive small extracellular vesicle detection
Source: Royal Society of Chemistry journal article supplement (doi:10.1039/d4ay01845a), 2024-11-11
Supplement: d4ay01845a1.pdf [file d4ay01845a1.pdf]

### Supplementary Material

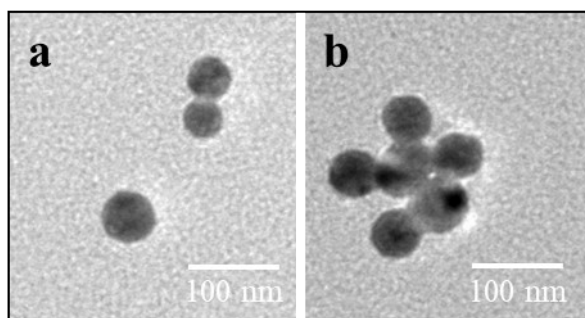

**Figure S1.** TEM result of the AuNPs. (a) the appearance of the AuNPs; (b) the aggregated AuNPs.

**Table S1.** Synthetic DNA sequences used in this work

| Name                 | Sequence (5' to 3')                                                                                                             |
|----------------------|---------------------------------------------------------------------------------------------------------------------------------|
| Sensing probe        | GTA AGT CAG CGA TTT TCC ACA TGT CAG CGA TAC<br>TGC TAG ACA TGT GGA AAA TCT CTA GCA GT GTG TCA<br>CGG GAG CGC ACC CAT GTA AGT TG |
| M probe              | GTA AGT CAG CGA TAC TGC TAG AGA TTT TCC ACA<br>TGT CTA GCA GTA TCG CTG ACA TGT GGA AAC ACC<br>CAT GTA AGT TG                    |
| Trigger sequence     | ACT GCT AGA GAT TTT CCA CAT                                                                                                     |
| H1 probe             | GCG CTA GAG ATT TTC CAC ATA CAA CTT TrAG GAC<br>TTA CCT AGC GC                                                                  |
| CD63 protein aptamer | CAC CCC ACC TCG CTC CCG TGA CAC TAA TGC TAC<br>TAT CCT                                                                          |

**Table S2.** A brief comparison of the method with former ones

| <b>Title</b>                         | <b>Principle</b>                          | <b>Sensitivity</b>                       | <b>Signal</b> | <b>Advantages and disadvantages</b>                                                                                                              | <b>Ref</b> |
|--------------------------------------|-------------------------------------------|------------------------------------------|---------------|--------------------------------------------------------------------------------------------------------------------------------------------------|------------|
| The method                           | CHA+ DNzyme assisted signal cycle         | 3.08 particles/ $\mu\text{L}$            | DSL           | Advantages: high sensitivity; easy-to-design; enzyme-free; portability;<br>Disadvantages: low universality.                                      |            |
| CRISPR-Cas12a                        | Trans-cleavage of Cas12a                  | $3 \times 10^3$ particles/ $\mu\text{L}$ | Fluorescence  | Advantages: high specificity;<br>Disadvantages: low universality; low sensitivity; require multiple enzymes; low portability.                    | 1          |
| Allosteric probe                     | Chain extension+ trans-cleavage of Cas12a | $1 \times 10^2$ particles/ $\mu\text{L}$ | Fluorescence  | Advantages: high sensitivity; wash-free;<br>Disadvantages: low universality; require multiple enzyme; low portability; complicated probe design. | 2          |
| AcmPLA                               | RCA                                       | $1 \times 10^3$ particles/ $\mu\text{L}$ | Fluorescence  | Advantages: high specificity;<br>Disadvantages: low universality; low sensitivity; require multiple enzymes; low portability.                    | 3          |
| Immobilization coupling with aptamer | Dual signal amplification                 | 100 particles/ $\mu\text{L}$             | Fluorescence  | Advantages: high sensitivity;<br>Disadvantages: low universalityrequire multiple enzymes; low portability.                                       | 4          |

RCA, rolling circle amplification; CHA, catalytic hairpin assembly; DSL, diameter light scattering;

## References:

1. Zhao, X.; Zhang, W.; Qiu, X.; Mei, Q.; Luo, Y.; Fu, W., Rapid and sensitive exosome detection with CRISPR/Cas12a. *Anal. Bioanal. Chem.* **2020**, *412* (3), 601-609.
2. Zhao, X.; Zeng, L.; Mei, Q.; Luo, Y., Allosteric Probe-Initiated Wash-Free Method for Sensitive Extracellular Vesicle Detection through Dual Cycle-Assisted CRISPR-Cas12a. *ACS Sens* **2020**, *5* (7), 2239-2246.
3. Zhao, X.; Luo, C.; Mei, Q.; Zhang, H.; Zhang, W.; Su, D.; Fu, W.; Luo, Y., Aptamer-Cholesterol-Mediated Proximity Ligation Assay for Accurate Identification of Exosomes. *Anal. Chem.* **2020**, *92* (7), 5411-5418.
4. He, Y.; Ren, Y.; Tang, J., Immobilization coupling with aptamer assisted dual cycle amplification for sensitive sEVs isolation and analysis. *Biotechnol. Lett* **2024**.
